# Supplementary material
Source: Springer Nature journal article supplement (https://www.springermedizin.de/resource/supplementary/12958_2009_543_MOESM4_ESM.pdf/9568268)

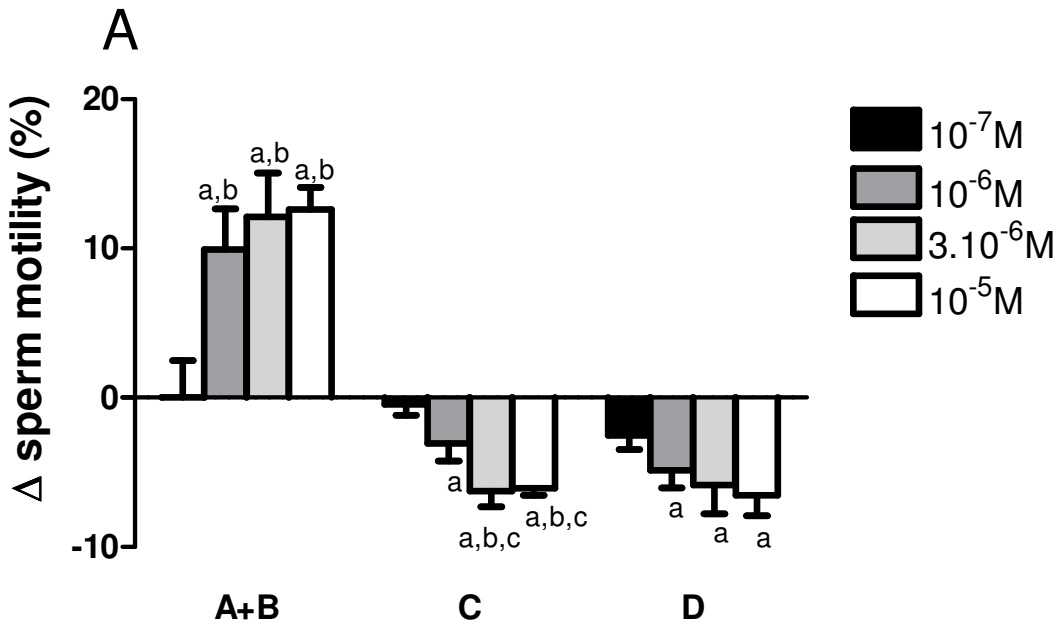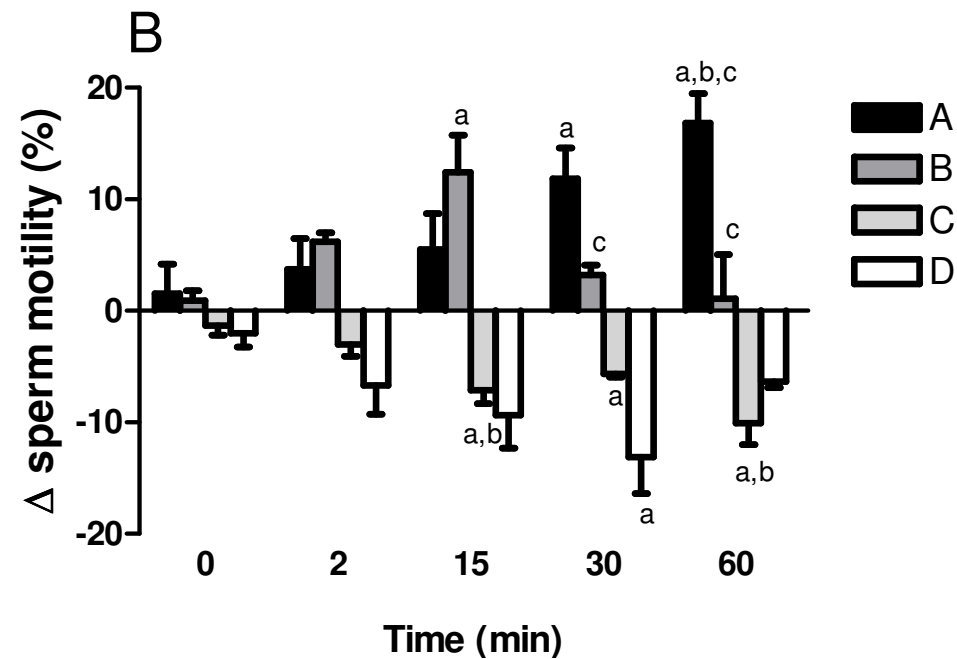

Supplement: MOESM4 [file 9568268]
